# Supplementary material for: W2O3I4 and WO2I2: metallic phases in the chemical transport reaction of tungsten
Source: Royal Society of Chemistry journal article supplement (doi:10.1039/d1dt01212f), 2021-01-01
Supplement: d1dt01212f1.pdf [file d1dt01212f1.pdf]

# **Supporting Information**

*for*

## **W<sub>2</sub>O<sub>3</sub>I<sub>4</sub> and WO<sub>2</sub>I<sub>2</sub>: Metallic Phases in the Chemical Transport Reaction of Tungsten**

Manuel Löber, Markus Ströbele, Carl P. Romao, and Hans-Jürgen Meyer\*

Section for Solid State and Theoretical Inorganic Chemistry, Institute of Inorganic Chemistry, University of Tübingen, Auf der Morgenstelle 18, 72076 Tübingen, Germany.

## Experimental Section

**Synthesis of  $\text{WO}_2\text{I}_2$ :**<sup>1</sup> W,  $\text{WO}_3$  and  $\text{I}_2$  were mixed and pestled in an agate mortar under dry argon atmosphere in a 1 : 2 : 6 molar ratio (100 mg total mass). The reaction mixture was transferred to a silica ampoule (length approx. 15 cm) and fused under vacuum. The silica ampoule was placed in a tube furnace with the reaction mixture in the middle of the tube. The ampoule was heated in a temperature gradient of 800 °C (middle of the tube) to 300 °C at 2 °C/min for 5 h, until cooling to room temperature at 2 °C/min. The crystalline product ( $\text{WO}_2\text{I}_2$ ) was obtained as metallic lustrous needle-shaped plates at the cooler section of the ampoule.

**Synthesis of  $\text{W}_2\text{O}_3\text{I}_4$ :** Ground powder of (50 mg)  $\text{WO}_2\text{I}_2$  was placed in a silica ampoule (length approx. 7 cm) under dry argon atmosphere. The silica ampoule was fused under vacuum and placed into a crucible furnace. The ampoule was heated at 2 °C/min to 380 °C and remained there for 48 h, until cooling to room temperature at 2 °C/min. The compound ( $\text{W}_2\text{O}_3\text{I}_4$ ) was obtained as black needles with metallic luster.

**Computational methods:** Density functional theory calculations were performed with the DFT software package Abinit (v. 9.2.2).<sup>2</sup> The projector-augmented wave (PAW) method<sup>3</sup> was used with the Perdew–Burke–Erzenhof exchange correlation functional<sup>4</sup> and the vdW-DFT-D3 dispersion correction.<sup>5</sup> PAW datasets were used as received from the Abinit repository. Methfessel–Paxton smearing was used to determine the occupation of metallic bands.<sup>6</sup> Plane-wave basis set cutoffs and **k**-point grid spacings were chosen following convergence studies (to 1% in pressure). Structural relaxation was performed prior to calculations of electronic band structures. Example input files are available as Supporting Information.

### **Powder X-ray Diffraction:**

PXRD patterns of well ground powders were recorded using a StadiP diffractometer (Stoe, Darmstadt) with Ge-monochromated  $\text{Cu-K}\alpha_1$  radiation and a Mythen1 Detector.

### **Single-Crystal X-ray Diffraction:**

Single crystals of  $\text{WO}_2\text{I}_2$  and  $\text{W}_2\text{O}_3\text{I}_4$  were collected and placed on the tip of a cryoloop. Data were recorded using a Rigaku XtaLAB Synergy-S single-crystal X-ray diffractometer equipped with HyPix-6000HE detector and monochromated  $\text{Mo-K}\alpha$  radiation ( $\lambda = 0.7107 \text{ \AA}$ ) at 100 K. The X-ray intensities were corrected for absorption with numerical method using CrysAlisPro 1.171.41.80a (Rigaku Oxford Diffraction, 2021). The structure was solved by direct methods (SHELXS),<sup>7</sup> and full-matrix least-squares structure refinements, performed with SHELXL-2014<sup>8</sup> implemented in Olex2 1.3-ac4.<sup>9</sup>

## Results

**Table S1.** selected Crystal and structure refinement data of  $\text{WO}_2\text{I}_2$  and  $\text{W}_2\text{O}_3\text{I}_4$ , recorded at 100 K.

| Empirical formula                                    | $\text{WO}_2\text{I}_2$ | $\text{W}_2\text{O}_3\text{I}_4$ |
|------------------------------------------------------|-------------------------|----------------------------------|
| CSD No.                                              | 2004434                 | 2054404                          |
| Formula weight / $\text{g}\cdot\text{mol}^{-1}$      | 469.65                  | 923.30                           |
| Temperature / K                                      | 100                     | 100                              |
| Wavelength/ pm                                       | 71.073                  | 71.073                           |
| Crystal system                                       | Orthorhombic            | Monoclinic                       |
| Space group                                          | <i>Immm</i>             | <i>I2/m</i>                      |
| <i>a</i> / pm                                        | 374.84(3)               | 924.84(6)                        |
| <i>b</i> / pm                                        | 390.49(3)               | 748.82(4)                        |
| <i>c</i> / pm                                        | 1662.8(1)               | 1336.48(8)                       |
| $\beta/^\circ$                                       |                         | 98.810(6)                        |
| Volume / $\text{nm}^3$                               | 0.24339(4)              | 0.91464(10)                      |
| Z                                                    | 2                       | 4                                |
| $\mu$ (Mo-K $\alpha$ ) / $\text{mm}^{-1}$            | 36.26                   | 38.58                            |
| Density (calculated) / $\text{g}\cdot\text{cm}^{-3}$ | 6.41                    | 6.71                             |
| Theta range for data collection / $^\circ$           | 4.90 to 25.93           | 3.52 to 26.02                    |
| Total number of reflections                          | 873                     | 9630                             |
| Refined parameters                                   | 14                      | 48                               |
| $R_1$                                                | 0.0181                  | 0.0297                           |
| $wR_2$                                               | 0.0403                  | 0.0672                           |
| Goodness-of-fit on $F^2$                             | 1.071                   | 1.048                            |

**Table S2.** Atomic coordinates, Wyckoff positions (Wyck) and equivalent isotropic displacement parameters (in  $\text{pm}^2 \times 10^{-1}$ ) for  $\text{WO}_2\text{I}_2$ .

| atom | Wyck | x   | y   | z          | $U(\text{eq})^a$ |
|------|------|-----|-----|------------|------------------|
| W1   | 2a   | 1/2 | 1/2 | 1/2        | 39(1)            |
| I1   | 4i   | 1/2 | 1/2 | 0.66072(4) | 12(1)            |
| O1   | 2d   | 1/2 | 0   | 1/2        | 6(2)             |
| O2   | 2b   | 0   | 1/2 | 1/2        | 18(2)            |

<sup>a)</sup>  $U(\text{eq})$  is defined as one-third of the trace of the orthogonalized  $U^{ij}$  tensor.

**Table S3.** Atomic coordinates, Wyckoff positions (Wyck) and equivalent isotropic displacement parameters (in  $\text{pm}^2 \times 10^{-1}$ ) for  $\text{W}_2\text{O}_3\text{I}_4$ .

| atom | Wyck | x          | y         | z         | $U(\text{eq})^a$ |
|------|------|------------|-----------|-----------|------------------|
| W1   | 4e   | 1/4        | 1/4       | 1/4       | 4(1)             |
| W2   | 4g   | 1/2        | 0.2927(1) | 1/2       | 5(1)             |
| I1   | 4i   | 0.3420(1)  | 0         | 0.5661(1) | 7(1)             |
| I2   | 4i   | 0.6923(1)  | 1/2       | 0.4190(1) | 8(1)             |
| I3   | 8j   | 0.0142(1)  | 0.2482(1) | 0.3483(1) | 9(1)             |
| O1   | 8j   | 0.3741(6)  | 0.2866(7) | 0.3761(4) | 8(1)             |
| O2   | 4i   | 0.2261(10) | 1/2       | 0.2351(7) | 18(2)            |

<sup>a)</sup>  $U(\text{eq})$  is defined as one-third of the trace of the orthogonalized  $U^{ij}$  tensor.

## References

- 1 J. Tillack, P. Eckerlin and J. H. Dettingmeijer, *Angew. Chem. Int. Ed.*, 1966, **5**, 421-421.
- 2 A. H. Romero, D. C. Allan, B. Amadon, G. Antonius, T. Applencourt, L. Baguet, J. Bieder, F. Bottin, J. Bouchet, E. Bousquet, F. Bruneval, G. Brunin, D. Caliste, M. Côté, J. Denier, C. Dreyer, P. Ghosez, M. Giantomassi, Y. Gillet, O. Gingras, D. R. Hamann, G. Hautier, F. Jollet, G. Jomard, A. Martin, H. P. C. Miranda, F. Naccarato, G. Petretto, N. A. Pike, V. Planes, S. Prokhorenko, T. Rangel, F. Ricci, G.-M. Rignanese, M. Royo, M. Stengel, M. Torrent, M. J. van Setten, B. Van Troeye, M. J. Verstraete, J. Wiktor, J. W. Zwanziger and X. Gonze, *J. Chem. Phys.*, 2020, **152**, 124102.
- 3 M. Torrent, F. Jollet, F. Bottin, G. Zérah and X. Gonze, *Comput. Mater. Sci.*, 2008, **42**, 337-351.
- 4 J. P. Perdew, K. Burke and M. Ernzerhof, *Phys. Rev. Lett.*, 1996, **77**, 3865.
- 5 S. Grimme, J. Antony, S. Ehrlich and H. Krieg, *J. Chem. Phys.*, 2010, **132**, 154104.
- 6 M. Methfessel and A. T. Paxton, *Phys. Rev. B*, 1989, **40**, 3616.
- 7 M. Sheldrick, University of Göttingen, 1997.
- 8 G. M. Sheldrick, *Acta Cryst.*, 2015, **C71**, 3-8.
- 9 O. V. Dolomanov, L. J. Bourhis, R. J. Gildea, J. A. K. Howard and H. Puschmann, *J. Appl. Crystallogr.*, 2009, **42**, 339-341.
